# Supplementary material
Source: Springer Nature journal article supplement (https://www.springermedizin.de/resource/supplementary/12958_2004_169_MOESM3_ESM.pdf/9567290)

1 2 3 4 5 6 7 8 9 10 11 12 13

A)

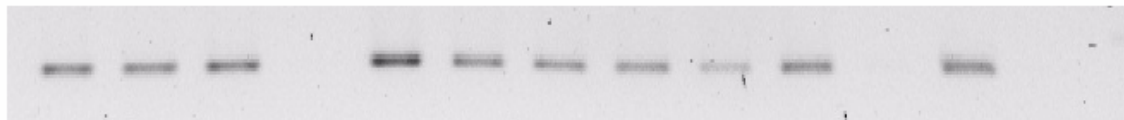

← 161 bp

B)

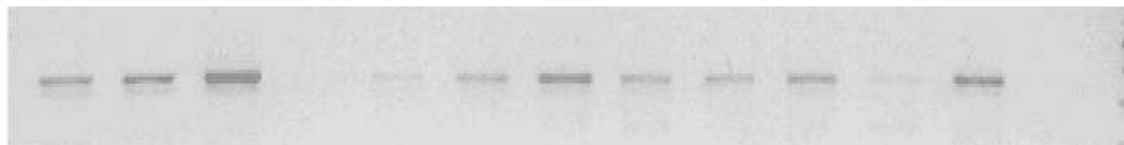

← 360 bp

C)

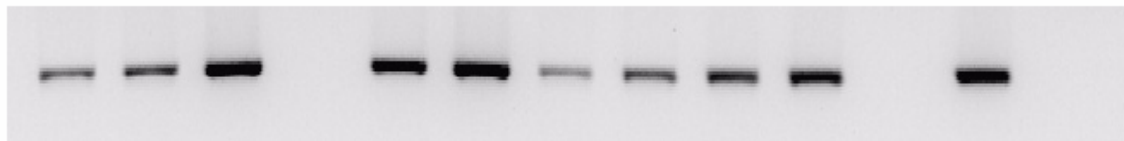

← 255 bp

Supplement: MOESM3 [file 9567290]
